# Supplementary material for: Immune correlates of postexposure vaccine protection against Marburg virus
Source: PubMed Central journal article supplement (PMC7033120; doi:10.1038/s41598-020-59976-3), 2020-02-20
Supplement: 41598_2020_59976_MOESM1_ESM.pdf [file 41598_2020_59976_MOESM1_ESM.pdf]

# 1 Immune correlates of postexposure vaccine protection against Marburg virus

2  
3 **Authors:** Courtney Woolsey<sup>1,2</sup>, Allen Jankeel<sup>3</sup>, Demetrius Matassov<sup>4</sup>, Joan B. Geisbert<sup>1,2</sup>,  
4 Krystle N. Agans<sup>1,2</sup>, Viktoriya Borisevich<sup>1,2</sup>, Robert W. Cross<sup>1,2</sup>, Daniel J. Deer<sup>1,2</sup>, Karla A.  
5 Fenton<sup>1,2</sup>, Theresa E. Latham<sup>4</sup>, Cheryl S. Gerardi<sup>4</sup>, Chad E. Mire<sup>1,2</sup>, John H. Eldridge<sup>4,5</sup>, Ilhem  
6 Messaoudi<sup>3</sup>, Thomas W. Geisbert<sup>1,2\*</sup>

## 7 **Affiliations:**

8 <sup>1</sup>Department of Microbiology and Immunology, University of Texas Medical Branch, Galveston,  
9 TX 77555, USA.

10 <sup>2</sup>Galveston National Laboratory, University of Texas Medical Branch, Galveston, TX 77555,  
11 USA.

12 <sup>3</sup>Department of Molecular Biology and Biochemistry, School of Biological Sciences, University  
13 of California, Irvine, Irvine, CA 92697, USA.

14 <sup>4</sup>Department of Virology and Vaccine Vectors, Profectus BioSciences Inc., Pearl River, NY  
15 10965, USA.

16 <sup>5</sup>Department of Immunology, Profectus BioSciences Inc., Pearl River, NY 10965, USA.

17 \* Corresponding author: Thomas W. Geisbert, Ph.D., University of Texas Medical Branch,  
18 Galveston National Laboratory, 301 University Blvd, Galveston, Texas 77555-0610  
19 ([twgeisbe@utmb.edu](mailto:twgeisbe@utmb.edu)).

20  
21  
22  
23  
24  
25  
26  
27  
28  
29  
30  
31  
32  
33  
34

**a**

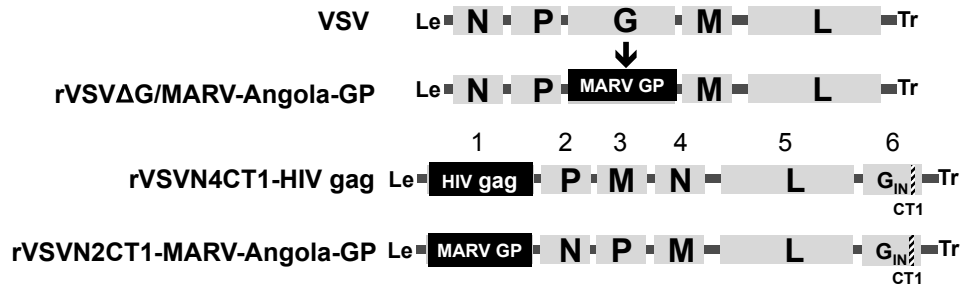

**b**

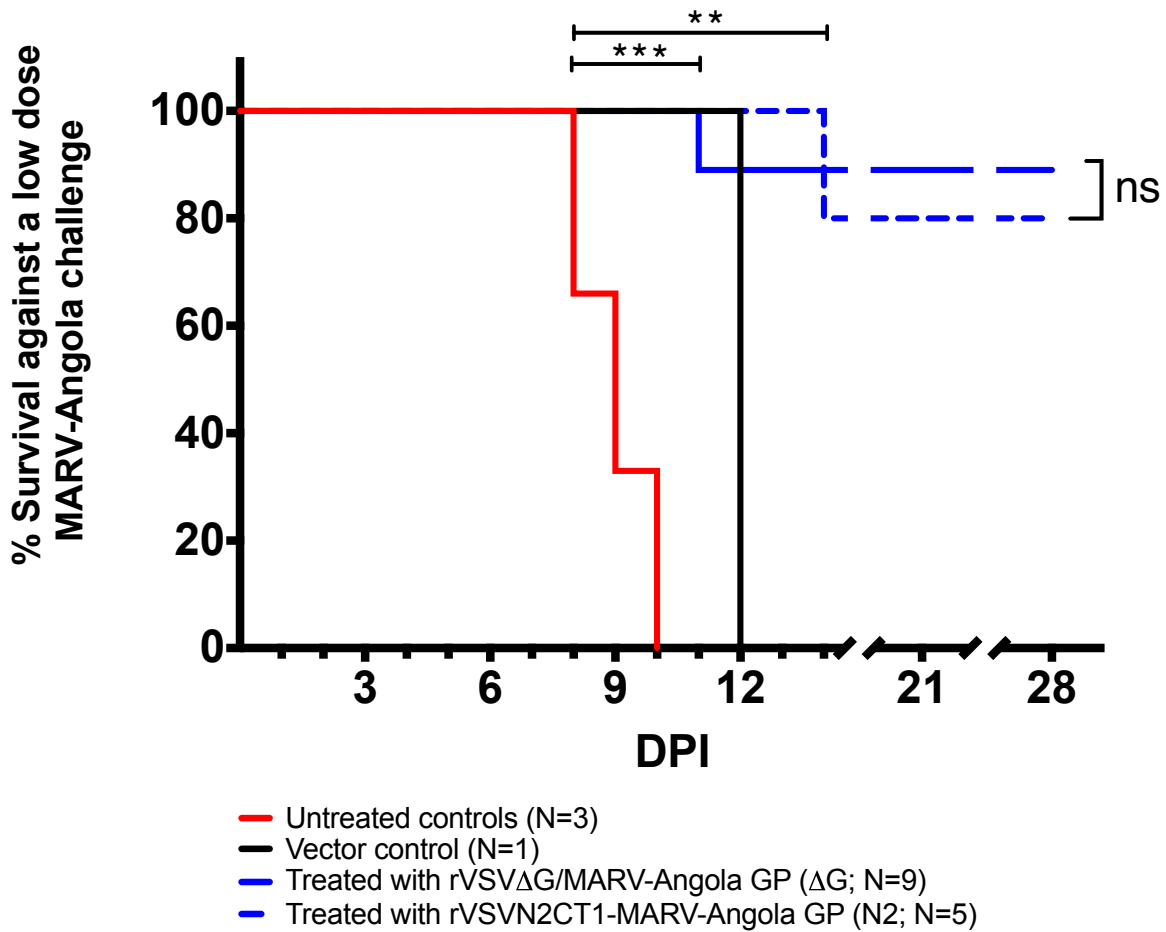

36

37 Fig. S1: rVSV vector design and survival of treated rhesus macaques.

38 **a)** rVSV $\Delta$ G/MARV-Angola-GP ( $\Delta$ G) was generated by swapping the native VSV Indiana  
 39 glycoprotein gene with a MARV-Angola glycoprotein gene via restriction enzyme-mediated  
 40 integration. To maximize antigen expression, the MARV-Angola-GP or HIV gag gene was  
 41 cloned into the first genomic position of rVSVN2CT1-MARV-Angola-GP (N2) or the

42 rVSVN4CT1-HIVgag vector control. The N2 and control vectors were attenuated by shuffling  
 43 the VSV nucleoprotein gene to the second or fourth position, respectively, and truncating the G  
 44 cytoplasmic tail from 29 to 1 amino acid(s). The black and white-striped region within G denotes  
 45 the amino acid substitution site. **b)** Kaplan-Meier survival curves of animals treated with  
 46 rVSV $\Delta$ G/MARV-Angola-GP ( $\Delta$ G; solid blue line; N=9), rVSVN2CT1-MARV-Angola-GP (N2;  
 47 segmented blue line; N=5), and rVSVN4CT1-HIV gag (vector control; black line; N=1). Groups  
 48 treated with rVSV vectors expressing MARV-Angola-GP were significantly different than the  
 49 untreated control group (red line; N=3). Statistical significance was not calculated against the  
 50 vector control due to a lack of biological replicates. Abbreviations: VSV (Vesicular stomatitis  
 51 virus); rVSV (recombinant vesicular stomatitis virus); N (VSV nucleoprotein); P (VSV  
 52 phosphoprotein); M (VSV matrix protein); G (VSV glycoprotein); CT1 (truncated cytoplasmic  
 53 tail); L (VSV polymerase); Le (leader); Tr (trailer);  $\Delta$ G (the native VSV G is absent); MARV  
 54 (Marburg virus, variant Angola); GP (MARV glycoprotein); N4 (the rVSV N is at position 4 in  
 55 the genome); N2 (the rVSV N is at position 2 in the genome); HIV (human immunodeficiency  
 56 virus); gag (group-specific antigen); PFU (plaque-forming units); DPI (days post-infection); ns  
 57 (not statistically significant). Log-rank test \*\*  $p \leq 0.01$ , \*\*\*  $p \leq 0.001$ .  
 58

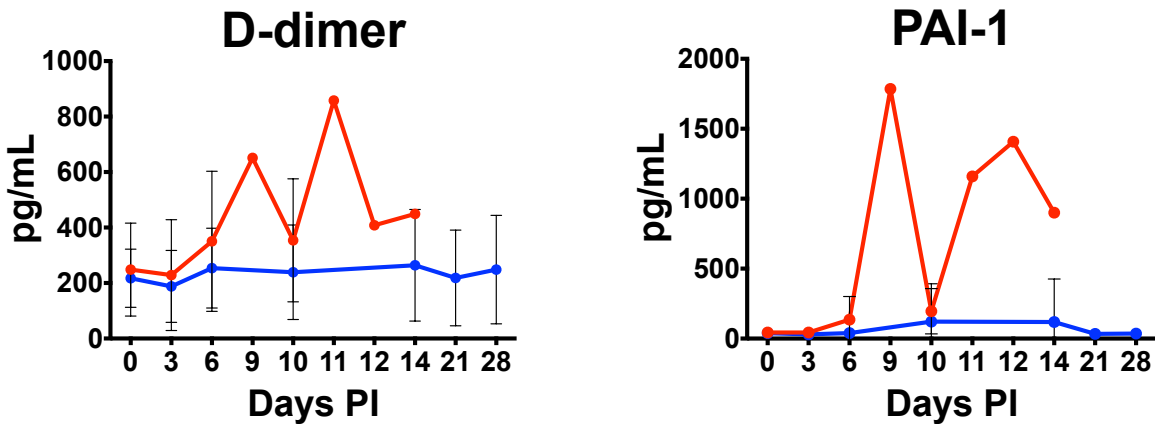

59  
 60 Figure S2. Plasma levels of coagulation-associated analytes in macaque subjects.  
 61 Red line represents the fatal dataset; blue line represents the treated survivor dataset.  
 62 Abbreviations: PAI-1 (plasminogen activator inhibitor-1); PI (post-infection).  
 63

| Animal                   | Day 0     | Day 6     | Day 10    | Terminal or Day 28 |
|--------------------------|-----------|-----------|-----------|--------------------|
| Control 1                | $\leq 10$ | N.D.      | N.D.      | $\leq 10$          |
| Control 2                | $\leq 10$ | N.D.      | N.D.      | $\leq 10$          |
| Control 3                | $\leq 10$ | N.D.      | $\leq 10$ | $\leq 10$          |
| Vector Control           | $\leq 10$ | N.D.      | N.D.      | $\leq 10$          |
| $\Delta$ G Treated Fatal | $\leq 10$ | $\leq 10$ | $\leq 10$ | $\leq 10$          |
| $\Delta$ G Survivor 1    | $\leq 10$ | $\leq 10$ | $\leq 10$ | 40                 |
| $\Delta$ G Survivor 2    | $\leq 10$ | $\leq 10$ | $\leq 10$ | 40                 |
| $\Delta$ G Survivor 3    | $\leq 10$ | $\leq 10$ | 20        | 20                 |
| $\Delta$ G Survivor 4    | $\leq 10$ | $\leq 10$ | $\leq 10$ | 40                 |

|               |      |      |      |      |
|---------------|------|------|------|------|
| ΔG Survivor 5 | ≤ 10 | ≤ 10 | ≤ 10 | 40   |
| ΔG Survivor 6 | ≤ 10 | ≤ 10 | ≤ 10 | 40   |
| ΔG Survivor 7 | ≤ 10 | ≤ 10 | 20   | 20   |
| ΔG Survivor 8 | ≤ 10 | ≤ 10 | ≤ 10 | 40   |
| N2 Fatal      | ≤ 10 | ≤ 10 | ≤ 10 | ≤ 10 |
| N2 Survivor 1 | ≤ 10 | ≤ 10 | 20   | 40   |
| N2 Survivor 2 | ≤ 10 | ≤ 10 | ≤ 10 | 20   |
| N2 Survivor 3 | ≤ 10 | ≤ 10 | 20   | 40   |
| N2 Survivor 4 | ≤ 10 | ≤ 10 | ≤ 10 | 40   |

64

65 Table S1: Neutralizing antibody titers.

66 Serum was evaluated for neutralizing antibody titers prior to challenge and terminally for  
67 untreated controls. Treated macaque sera were additionally evaluated on days 10 and 14 post-  
68 challenge. The reciprocal dilution titer of sera that neutralized ≥ 50% of viral plaques (PRNT<sub>50</sub>  
69 value) is reported. Abbreviations: ΔG, referring to individual monkey treated with  
70 rVSVΔG/MARV-Angola-GP; N2, referring to individual monkey treated with rVSVN2CT1-  
71 MARV-Angola GP; N.D., not determined.

72

| Animal           | Axillary LN | Inguinal LN | Liver | Spleen | Kidney | Adrenal Gland | Lung |
|------------------|-------------|-------------|-------|--------|--------|---------------|------|
| Control 1        | +           | ++          | +++   | ++++   | ++     | ++            | +++  |
| Control 2        | ++++        | ++++        | ++++  | ++++   | ++++   | ++++          | ++++ |
| Control 3        | ++++        | ++++        | ++++  | ++++   | ++++   | ++++          | ++++ |
| Vector Control   | ++++        | ++++        | ++++  | ++++   | ++++   | ++            | +++  |
| ΔG Treated Fatal | +           | ++          | +++   | ++++   | ++     | ++            | +++  |
| ΔG Survivor 1    | N.D.        | +           | N.D.  | +      | N.D.   | N.D.          | +    |
| ΔG Survivor 2    | +           | +           | +     | +      | +      | N.D.          | N.D. |
| ΔG Survivor 3    | +           | N.D.        | N.D.  | N.D.   | N.D.   | N.D.          | N.D. |
| ΔG Survivor 4    | +           | +           | +     | +      | +      | +             | +    |
| ΔG Survivor 5    | +           | +           | +     | +      | +      | +             | +    |
| ΔG Survivor 6    | +           | +           | N.D.  | +      | +      | +             | +    |
| ΔG Survivor 7    | +           | +           | +     | +      | +      | +             | +    |
| ΔG Survivor 8    | +           | +           | +     | +      | +      | +             | +    |
| N2 Fatal         | +           | ++          | ++++  | +++    | ++     | ++++          | +++  |
| N2 Survivor 1    | +           | +           | +     | +      | +      | +             | +    |
| N2 Survivor 2    | +           | +           | +     | +      | +      | +             | +    |
| N2 Survivor 3    | N.D.        | N.D.        | +     | +      | +      | +             | N.D. |
| N2 Survivor 4    | +           | +           | +     | +      | +      | N.D.          | +    |

73

74 Table S2: MARV viral load in tissues.

75 Samples from MARV-Angola-infected animals were normalized according to onset of viremia  
76 (mid-disease). Late-disease corresponded to 0-2 days before the animal succumbed, at peak

77 viremia. The median time points for these disease stages were used to define mid-disease (6 DPI)  
 78 and late-disease (10 DPI) in the survivor dataset. +, < 8 logs; ++, 9 logs; +++, > 10 logs; +++++,  
 79 > 11 LOGS. Abbreviations: N.D., not detected; LN, lymph node.  
 80

| Animal                   | Group    | Mid-Disease DPI | Late-Disease DPI |
|--------------------------|----------|-----------------|------------------|
| Control 1                | Fatal    | 3               | 6                |
| Control 2                | Fatal    | 6               | 9                |
| Control 3                | Fatal    | 6               | 10               |
| Vector Control           | Fatal    | 6               | 10               |
| $\Delta$ G Treated Fatal | Fatal    | 6               | 10               |
| $\Delta$ G Survivor 1    | Survivor | 6               | 10               |
| $\Delta$ G Survivor 2    | Survivor | 6               | 10               |
| $\Delta$ G Survivor 3    | Survivor | 6               | 10               |
| $\Delta$ G Survivor 4    | Survivor | 6               | 10               |
| $\Delta$ G Survivor 5    | Survivor | 6               | 10               |
| $\Delta$ G Survivor 6    | Survivor | 6               | 10               |
| $\Delta$ G Survivor 7    | Survivor | 6               | 10               |
| $\Delta$ G Survivor 8    | Survivor | 6               | 10               |
| N2 Fatal                 | Fatal    | 10              | 14               |
| N2 Survivor 1            | Survivor | 6               | 10               |
| N2 Survivor 2            | Survivor | 6               | 10               |
| N2 Survivor 3            | Survivor | 6               | 10               |
| N2 Survivor 4            | Survivor | 6               | 10               |

81  
 82 Table S3: Normalization of samples for RNAseq, flow cytometry, and cytokine analyses.  
 83 Samples from MARV-Angola-infected animals were normalized according to onset of viremia  
 84 (mid-disease). Late-disease in the fatal group corresponded to 0-2 days before the animal died, at  
 85 peak viremia. The median time points for these disease stages for the survivor group were used  
 86 to define mid-disease (6 DPI) and late-disease (10 DPI).  
 87

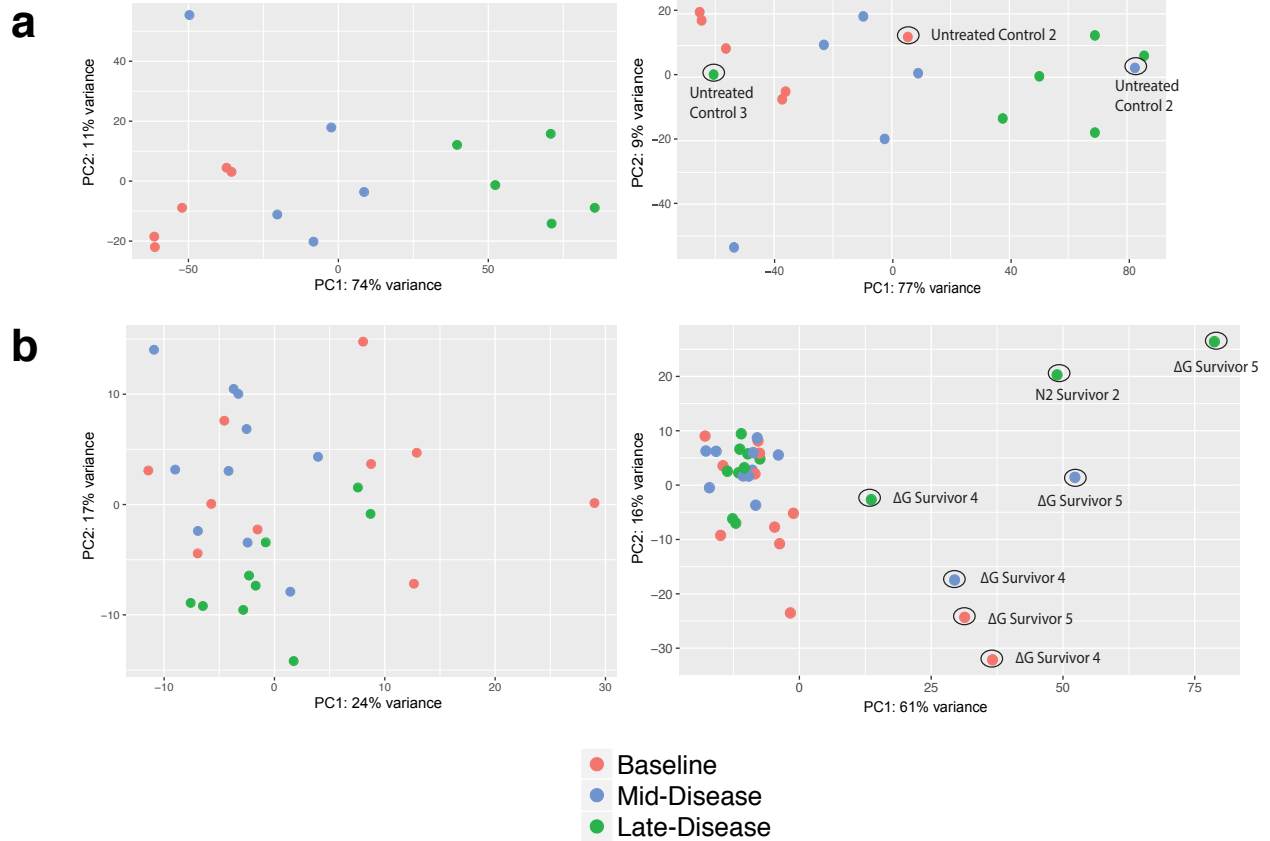

88

89 Figure S3: PCAs of survivor and fatal group transcriptomic datasets.

90 Principal component analyses (PCAs) of **a**) fatal and **b**) treated survivor samples with inclusion

91 (right panels) or exclusion (left panels) of outliers (circled dots). No outliers were excluded from

92 our transcriptomic analyses for either cohort as we determined that inclusion of these did not

93 considerably skew these datasets. Baseline, mid-disease, and late-disease phases are represented

94 by red, blue, and green dots, respectively.

95

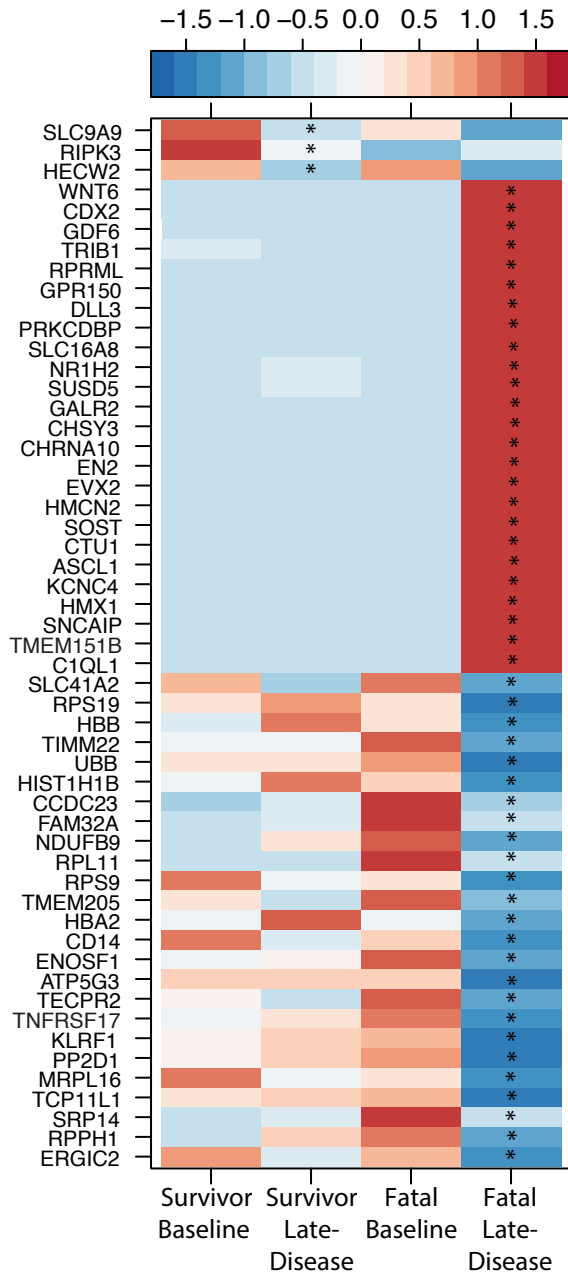

96

97 Fig. S4. Comparison of the most highly upregulated and downregulated DEGs at late-disease.

98 Heatmap of DEGs observed at late-disease. DEGs were calculated using EdgeR against a pre-  
 99 challenge baseline to establish the most highly expressed genes. A scaled heatmap based on  
 100 RPKM values within that set of genes (red represents increased expression while blue represents  
 101 decreased expression); each column represents the median RPKM values for each time point.  
 102 Only human homologs and protein-coding genes were analyzed. \*: statistically significant, FDR-  
 103 corrected p-value of  $\leq 0.05$ .

104

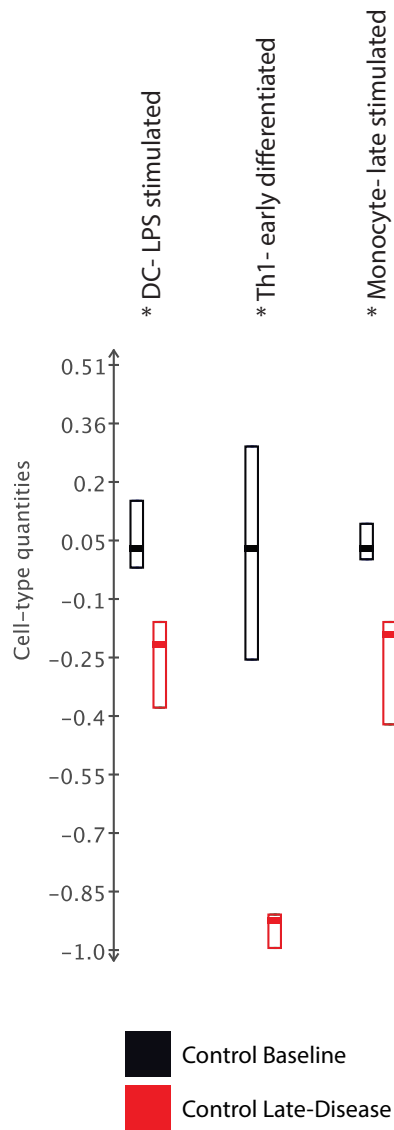

105

106 Figure S5. ImmQuant comparative view analysis of the relative contribution of immune cell  
 107 subsets to differential gene expression within the control group.

108 ImmQuant uses a database based on genome-wide microarray expression profiling of human  
 109 immune cells from reported studies. Results were calculated using the Digital Cell Quantifier  
 110 (DCQ) algorithm with human-based FACS marker genes. The algorithm infers an increase or  
 111 decrease in cell-type quantities relative to a Dy 0 baseline. "\*" indicates statistically significant  
 112 putative changes in the cell subset frequency.

113



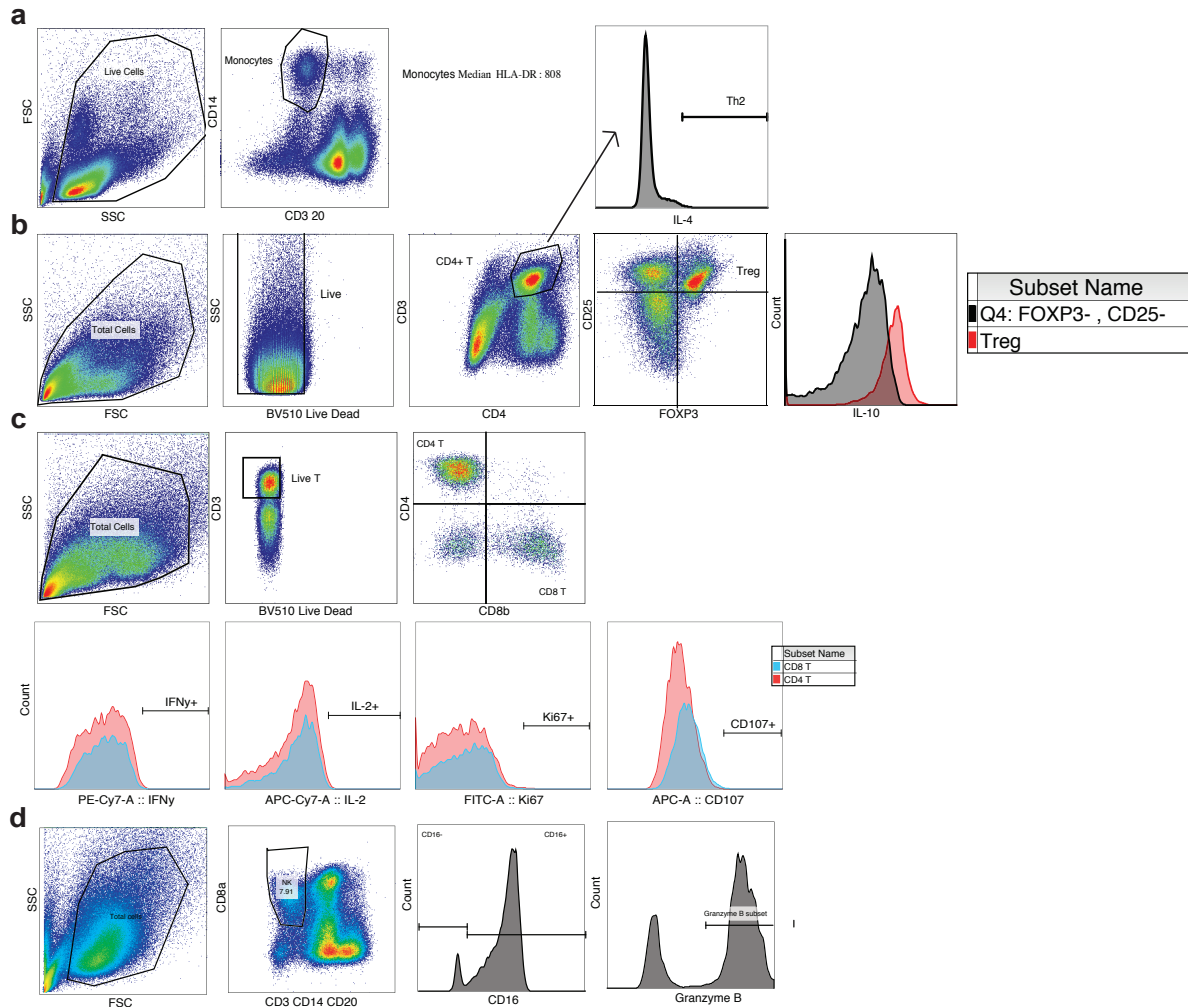

114

115 Figure S6. PBMC flow gating strategy.

116 **a)** Monocytes were identified based on lack of CD3 (T-cell) and CD20 (B-cell) expression, and  
 117 positive CD14 expression. The mean fluorescence intensity of HLA-DR was then calculated  
 118 within this population. **b)** After live/dead staining, regulatory T-cells (Tregs) were positively  
 119 selected for the following markers: CD3, CD4, CD25, and FOXP3. We confirmed expression of  
 120 IL-10 within the Treg subset. Th2 cells were gated on within the CD3+CD4+IL-4+ cell  
 121 population. **c)** To identify Th1 and CTL populations, cells were stained with CD3, CD4, CD8b,  
 122 IL-2, IFN-gamma, and CD107a fluorochrome-conjugated antibodies. T helper 1 (Th1) cells were  
 123 identified by their expression of CD3, CD4, IL-2, and IFN-gamma. The frequency of  
 124 proliferating Th1 cells was determined using the Ki67 marker. CTLs were identified by their  
 125 expression of CD3, CD8, and the degranulation marker, CD107. **d)** NK cells were identified  
 126 based on lack of CD3, CD20, and CD14 expression, and positive CD8 $\alpha$  expression. Percentages  
 127 of CD16+ and granzyme B+ populations were then determined within this population **a b c d)**  
 128 Approximately 200,000 events were collected on a BD FACS Canto II cytometer and analyzed  
 129 using FACS Diva and FlowJo software.
